# Supplementary material
Source: Springer Nature journal article supplement (https://www.springermedizin.de/resource/supplementary/12913_2013_2936_MOESM4_ESM.pdf/9531960)
Supplement: MOESM4 [file 9531960]

## 12: Antipsychotics in dementia Rate of use of risperidone

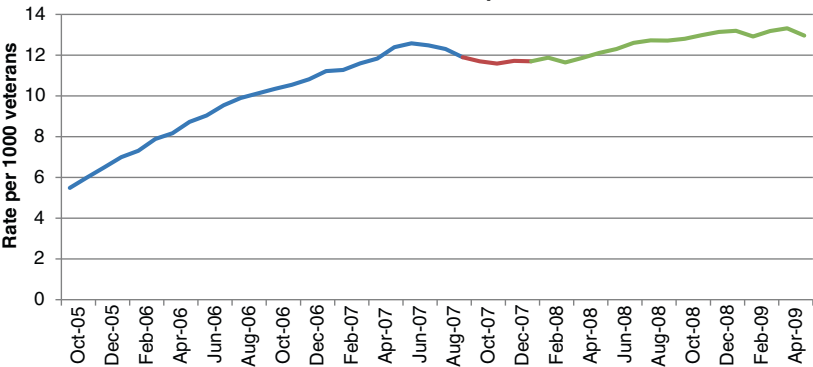

— Pre-intervention period: Oct 2005-Sep 2007. Monthly change: 1.036 (1.03-1.04);  $p < 0.0001$ . This means that use of risperidone was increasing by 3.6% per month pre-intervention.

— Intervention period: Oct 2007-Jan 2008. Change in use: 0.86 (0.82-0.89);  $p < 0.0001$ . This means that use of risperidone decreased by 14.3% at the time of the intervention.

— Post-intervention period: Feb 2008-Sep 2009. Monthly change (relative to pre-intervention): 0.97 (0.96-0.98);  $p < 0.0001$ . This means that the rate of use was decreasing by 2.7% per month relative to the pre intervention trend.

i.e. overall use continued to increase, but only by 0.9% per month. Overall effect: 1725 fewer veterans dispensed risperidone.
